# Supplementary material for: Clinicopathological and epidemiological significance of breast cancer subtype reclassification based on p53 immunohistochemical expression
Source: PubMed Central journal article supplement (PMC6658470; doi:10.1038/s41523-019-0117-7), 2019-07-25
Supplement: 41523_2019_117_MOESM1_ESM.pdf [file 41523_2019_117_MOESM1_ESM.pdf]

**Supplementary Table 1.** Details of antibodies and staining equipment for immunohistochemical stains

| Antibody | Clone                    | Manufacturer | Catalogue number | Stainer                  |
|----------|--------------------------|--------------|------------------|--------------------------|
| ER       | SP1 (rabbit monoclonal)  | Roche        | 790-4325         | Roche Ventana XT         |
| PR       | 1E2 (rabbit monoclonal)  | Roche        | 790-4296         | Roche Ventana XT         |
| HER2     | 4B5 (rabbit monoclonal)  | Roche        | 790-4493         | Roche Ventana XT         |
| EGFR     | 5B7 (rabbit monoclonal)  | Roche        | 790-4347         | Roche Ventana XT         |
| Ki67     | MIB-1 (mouse monoclonal) | Maixin       | MAB-0129         | Roche Ventana XT         |
| CK5/6    | MX040 (mouse monoclonal) | Maixin       | MAB-0276         | Dako Autostainer Link 48 |
| TP53     | MX008 (mouse monoclonal) | Maixin       | MAB-0142         | Leica RM2235             |

**Supplementary Table 2.** Odds ratios and 95% confidence intervals for the associations between breast cancer risk factors and phenotypes (p53+ vs p53-) of luminal A-like breast cancer among younger ( $\leq 50$  years) and older women ( $> 50$  years)

| Characteristic         | $\leq 50$ years   |         | $> 50$ years         |          |
|------------------------|-------------------|---------|----------------------|----------|
|                        | p53+ vs p53-      |         | p53+ vs p53-         |          |
|                        | OR (95% CI)       | p-value | OR (95% CI)          | p-value  |
| Age at Menarche        |                   |         |                      |          |
| $\leq 12$ yrs.         | 1.00 (reference)  |         | 1.00 (reference)     |          |
| 13 yrs.                | 0.82 (0.52, 1.27) | 0.37    | 1.60 (0.94, 2.75)    | 0.08     |
| 14 yrs.                | 0.69 (0.45, 1.05) | 0.09    | 1.23 (0.73, 2.09)    | 0.43     |
| $\geq 15$ yrs.         | 0.95 (0.64, 1.40) | 0.79    | 1.29 (0.80, 2.08)    | 0.29     |
| <i>p_trend</i>         |                   | 0.89    |                      | 0.97     |
| Parity                 |                   |         |                      |          |
| None                   | 1.00 (reference)  |         | 1.00 (reference)     |          |
| 1                      | 2.07 (1.16, 3.70) | 0.01    | 15.23 (2.03, 114.42) | 0.01     |
| 2                      | 2.36 (1.25, 4.47) | 0.01    | 13.22 (1.75, 99.91)  | 0.01     |
| $\geq 3$               | 2.22 (0.95, 5.12) | 0.06    | 20.21 (2.63, 155.31) | $< 0.01$ |
| <i>p_trend</i>         |                   | 0.06    |                      | 0.06     |
| Breastfeed             |                   |         |                      |          |
| Never                  | 1.00 (reference)  |         | 1.00 (reference)     |          |
| Ever                   | 1.34 (0.91, 1.98) | 0.14    | 1.47 (0.92, 2.33)    | 0.10     |
| BMI, kg/m <sup>2</sup> |                   |         |                      |          |
| $\leq 18.5$            | 1.07 (0.43, 2.68) | 0.88    | 0.67 (0.20, 2.22)    | 0.51     |
| 18.5-24.99             | 1.00 (reference)  |         | 1.00 (reference)     |          |
| 25-30                  | 1.04 (0.79, 1.38) | 0.77    | 1.01 (0.77, 1.32)    | 0.93     |
| $> 30$                 | 1.07 (0.64, 1.79) | 0.78    | 0.87 (0.56, 1.34)    | 0.52     |
| Family History         |                   |         |                      |          |
| Absent                 | 1.00 (reference)  |         | 1.00 (reference)     |          |
| Present                | 1.08 (0.67, 1.75) | 0.73    | 0.82 (0.51, 1.32)    | 0.42     |

Odds ratios and 95% confidence interval were obtained from subtype-specific logistic regression models mutually adjusted for age, age at menarche, parity, breastfeeding, BMI and family history of breast cancer.

**Supplementary Table 3.** Adjusted odds ratios and 95% confidence intervals for the associations between breast cancer clinicopathological and epidemiological factors and p53 expression in luminal A-like breast cancer defined using different cutoff-points for ER and PR expression

| Characteristic    | Luminal A-like (1% ER and PR) |         | Luminal A-like (10% ER and PR) |         | Luminal A-like (20% ER and PR) |         |
|-------------------|-------------------------------|---------|--------------------------------|---------|--------------------------------|---------|
|                   | p53+ vs p53-                  |         | p53+ vs p53-                   |         | p53+ vs p53-                   |         |
|                   | OR (95% CI)                   | p-value | OR (95% CI)                    | p-value | OR (95% CI)                    | p-value |
| Age, yrs.         |                               |         |                                |         |                                |         |
| <40               | 1.00 (reference)              |         | 1.00 (reference)               |         | 1.00 (reference)               |         |
| 40-50             | 1.04 (0.81, 1.32)             | 0.76    | 1.12 (0.87, 1.44)              | 0.38    | 1.07 (0.80, 1.44)              | 0.62    |
| 50-60             | 0.83 (0.65, 1.06)             | 0.14    | 0.84 (0.65, 1.09)              | 0.19    | 0.78 (0.58, 1.06)              | 0.11    |
| 60-70             | 0.78 (0.59, 1.03)             | 0.08    | 0.83 (0.62, 1.11)              | 0.21    | 0.76 (0.55, 1.06)              | 0.11    |
| 70+               | 0.62 (0.44, 0.88)             | <0.01   | 0.72 (0.50, 1.04)              | 0.08    | 0.78 (0.51, 1.19)              | 0.24    |
| <i>p_trend</i>    |                               | <0.01   |                                | 0.03    |                                | 0.04    |
| Histologic grade  |                               |         |                                |         |                                |         |
| Well diff.        | 1.00 (reference)              |         | 1.00 (reference)               |         | 1.00 (reference)               |         |
| Mod. diff.        | 1.69 (1.35, 2.12)             | <0.01   | 1.41 (1.11, 1.80)              | <0.01   | 1.32 (1.00, 1.73)              | 0.05    |
| Tumor size        |                               |         |                                |         |                                |         |
| <2cm              | 1.00 (reference)              |         | 1.00 (reference)               |         | 1.00 (reference)               |         |
| 2-5cm             | 1.18 (0.95, 1.47)             | 0.13    | 1.01 (0.80, 1.27)              | 0.91    | 1.20 (0.90, 1.59)              | 0.21    |
| >5cm              | 1.14 (0.57, 2.27)             | 0.71    | 0.90 (0.44, 1.84)              | 0.77    | 0.87 (0.37, 2.01)              | 0.75    |
| <i>p_trend</i>    |                               | 0.15    |                                | 0.95    |                                | 0.26    |
| Nodal Involvement |                               |         |                                |         |                                |         |
| 0                 | 1.00 (reference)              |         | 1.00 (reference)               |         | 1.00 (reference)               |         |
| 1-3               | 0.99 (0.84, 1.17)             | 0.92    | 0.94 (0.79, 1.12)              | 0.49    | 0.94 (0.76, 1.15)              | 0.53    |
| >3                | 1.16 (0.95, 1.40)             | 0.14    | 1.10 (0.89, 1.35)              | 0.37    | 1.09 (0.87, 1.39)              | 0.45    |
| KI67              |                               |         |                                |         |                                |         |
| Q1 (<10)          | 1.00 (reference)              |         | 1.00 (reference)               |         | 1.00 (reference)               |         |
| Q2 (10-20)        | 1.28 (1.05, 1.55)             | 0.02    | 1.32 (1.07, 1.62)              | <0.01   | 1.38 (1.07, 1.79)              | 0.01    |
| Q3 (20-35)        | 1.77 (1.45, 2.14)             | <0.01   | 1.78 (1.44, 2.19)              | <0.01   | 1.97 (1.53, 2.55)              | <0.01   |
| Q4 (>35)          | 2.47 (1.88, 3.24)             | <0.01   | 2.43 (1.82, 3.24)              | <0.01   | 2.49 (1.77, 3.51)              | <0.01   |
| <i>p_trend</i>    |                               | <0.01   |                                | <0.01   |                                | <0.01   |
| CK5/6             |                               |         |                                |         |                                |         |
| Negative          | 1.00 (reference)              |         | 1.00 (reference)               |         | 1.00 (reference)               |         |
| Positive          | 1.55 (0.85, 2.80)             | 0.15    | 0.91 (0.45, 1.85)              | 0.80    | 1.38 (0.58, 3.26)              | 0.46    |
| EGFR              |                               |         |                                |         |                                |         |
| Negative          | 1.00 (reference)              |         | 1.00 (reference)               |         | 1.00 (reference)               |         |
| Positive          | 1.95 (1.41, 2.69)             | <0.01   | 1.79 (1.24, 2.57)              | <0.01   | 1.77 (1.18, 2.67)              | <0.01   |
| Age at Menarche   |                               |         |                                |         |                                |         |
| ≤12 yrs.          | 1.00 (reference)              |         | 1.00 (reference)               |         | 1.00 (reference)               |         |
| 13 yrs.           | 1.07 (0.76, 1.50)             | 0.69    | 1.08 (0.76, 1.53)              | 0.65    | 1.05 (0.73, 1.52)              | 0.78    |
| 14 yrs.           | 0.86 (0.62, 1.19)             | 0.37    | 0.85 (0.60, 1.18)              | 0.33    | 0.83 (0.58, 1.18)              | 0.30    |
| ≥15 yrs.          | 1.02 (0.76, 1.50)             | 0.91    | 1.01 (0.75, 1.37)              | 0.92    | 1.06 (0.77, 1.45)              | 0.72    |
| <i>p_trend</i>    |                               | 0.99    |                                | 0.98    |                                | 0.68    |
| Parity            |                               |         |                                |         |                                |         |
| None              | 1.00 (reference)              |         | 1.00 (reference)               |         | 1.00 (reference)               |         |
| 1                 | 2.67 (1.59, 4.51)             | <0.01   | 2.88 (1.67, 4.96)              | <0.01   | 3.23 (1.80, 5.81)              | <0.01   |
| 2                 | 2.63 (1.52, 4.55)             | <0.01   | 2.93 (1.66, 5.17)              | <0.01   | 3.40 (1.85, 6.27)              | <0.01   |
| >3                | 3.67 (2.01, 6.71)             | <0.01   | 3.94 (2.10, 7.40)              | <0.01   | 4.58 (2.34, 8.99)              | <0.01   |
| <i>p_trend</i>    |                               | <0.01   |                                | <0.01   |                                | <0.01   |
| Breastfeed        |                               |         |                                |         |                                |         |
| Never             | 1.00 (reference)              |         | 1.00 (reference)               |         | 1.00 (reference)               |         |
| Ever              | 1.38 (1.03, 1.85)             | 0.03    | 1.46 (1.08, 1.97)              | 0.01    | 1.66 (1.20, 2.30)              | <0.01   |
| BMI               |                               |         |                                |         |                                |         |
| ≤18.5             | 0.90 (0.44, 1.85)             | 0.78    | 1.02 (0.47, 2.22)              | 0.95    | 1.00 (0.43, 2.33)              | 0.99    |
| 18.5-24.99        | 1.00 (reference)              |         | 1.00 (reference)               |         | 1.00 (reference)               |         |
| 25-30             | 1.01 (0.84, 1.23)             | 0.88    | 1.00 (0.82, 1.22)              | 0.96    | 1.05 (0.85, 1.30)              | 0.62    |
| >30               | 0.93 (0.67, 1.30)             | 0.68    | 0.88 (0.63, 1.24)              | 0.47    | 1.00 (0.70, 1.42)              | 0.99    |
| Family History    |                               |         |                                |         |                                |         |
| Absent            | 1.00 (reference)              |         | 1.00 (reference)               |         | 1.00 (reference)               |         |
| Present           | 0.97 (0.69, 1.35)             | 0.84    | 0.95 (0.67, 1.34)              | 0.75    | 0.91 (0.63, 1.32)              | 0.62    |

Odds ratios and 95% confidence intervals were from mutually adjusted multivariate polytomous logistic models separately for clinicopathological features and epidemiological factors.
